# Supplementary material for: Signalling Pathways Mediating the Effects of CD40-Activated CD40L Reverse Signalling on Inhibitory Medium Spiny Neuron Neurite Growth
Source: MDPI journal article supplement (doi:10.3390/cells10040829), 2021-04-07
Supplement: s1 [file s1]

## Predicted Functional Partners

| CD40L     |       | PKCγ    |       | in common     |       |       |
|-----------|-------|---------|-------|---------------|-------|-------|
|           |       |         |       | CD40L         | PKCγ  |       |
| Cd40      | 0,999 | Gria1   | 0,928 | Casp3         | 0,43  | 0,474 |
| Tnf       | 0,977 | Hras1   | 0,926 | Cd38          | 0,635 | 0,8   |
| Traf3     | 0,975 | Kras    | 0,925 | Fos           | 0,65  | 0,893 |
| Traf2     | 0,97  | Ap2a1   | 0,922 | Fyn           | 0,47  | 0,407 |
| Birc2     | 0,969 | Ap2a2   | 0,922 | Icam1         | 0,856 | 0,557 |
| Tnfsf13b  | 0,964 | Dvl2    | 0,921 | Icam5         | 0,511 | 0,452 |
| Lta       | 0,959 | Gria4   | 0,917 | Il2           | 0,901 | 0,408 |
| Tnfrsf13c | 0,944 | Stxbp3a | 0,917 | Itgb1         | 0,543 | 0,849 |
| Map3k14   | 0,94  | Gria3   | 0,915 | Itgb3         | 0,537 | 0,838 |
| Tnfrsf1b  | 0,938 | Adrbk1  | 0,912 | Itgb7         | 0,466 | 0,846 |
| Ltbr      | 0,931 | Grip1   | 0,909 | Jak1          | 0,566 | 0,437 |
| Ltb       | 0,929 | Fzd4    | 0,908 | Jak2          | 0,596 | 0,439 |
| Tnfsf12   | 0,928 | Plcg1   | 0,908 | Jak3          | 0,704 | 0,437 |
| Tnfrsf11a | 0,925 | Ap2m1   | 0,908 | Lck           | 0,59  | 0,437 |
| Tnfsf11   | 0,918 | Plcg2   | 0,908 | Lyn           | 0,547 | 0,876 |
| Tnfsf14   | 0,916 | Stx4a   | 0,907 | Map3k1        | 0,581 | 0,527 |
| Psm10     | 0,915 | Nras    | 0,906 | Map3k14       | 0,94  | 0,424 |
| Psm1      | 0,913 | Prkcb   | 0,904 | Map3k5        | 0,478 | 0,526 |
| Cd86      | 0,914 | Wnt5a   | 0,902 | Mapk1 (ERK2)  | 0,529 | 0,629 |
| Psm8      | 0,913 | Ap2s1   | 0,901 | Mapk10 (JNK3) | 0,561 | 0,468 |
| Tnfrsf12a | 0,913 | Ap2b1   | 0,901 | Mapk11        | 0,45  | 0,536 |
| Il4       | 0,913 | Rras    | 0,897 | Mapk14        | 0,674 | 0,547 |
| Psm10     | 0,908 | Rras2   | 0,894 | Mapk3 (ERK1)  | 0,592 | 0,639 |
| Il2       | 0,901 | Adcy9   | 0,894 | Mapk8 (JNK1)  | 0,678 | 0,474 |
| Psm6      | 0,901 | Braf    | 0,893 | Mapk9 (JNK2)  | 0,593 | 0,447 |
| Psm5      | 0,9   | Fos     | 0,893 | Nfkb1         | 0,778 | 0,516 |
| Psm6      | 0,9   | Raf1    | 0,893 | Nfkb2         | 0,595 | 0,44  |
| Psm6      | 0,9   | Rhoa    | 0,89  | Nfkb1a        | 0,679 | 0,482 |
| Gm21972   | 0,9   | Rhob    | 0,888 | Nos1          | 0,535 | 0,513 |
| Gm5422    | 0,9   | Gnao1   | 0,888 | Sele          | 0,702 | 0,557 |
| Psm1      | 0,9   | Rhoc    | 0,888 | Spna2         | 0,54  | 0,502 |
| Psm11     | 0,9   | Atf2    | 0,886 | Src           | 0,536 | 0,609 |
| Psm2      | 0,9   | Gnai1   | 0,885 | Stat5a        | 0,66  | 0,439 |
| Psm3      | 0,9   | Gnb1    | 0,884 | Stat5b        | 0,504 | 0,439 |
| Psm4      | 0,9   | Gnb4    | 0,883 | Trp53         | 0,495 | 0,464 |
| Psm3      | 0,9   | Itgb4   | 0,882 | Tyk2          | 0,497 | 0,437 |
| Psm9      | 0,9   | Adcy8   | 0,882 | Vcam1         | 0,62  | 0,539 |
| Gm4950    | 0,9   | Gnai2   | 0,882 |               |       |       |
| Psm5      | 0,9   | Gnai3   | 0,882 |               |       |       |
| Gm8394    | 0,9   | Gnb2    | 0,881 |               |       |       |
| Psm3      | 0,9   | Gnb3    | 0,881 |               |       |       |
| Psm8      | 0,9   | Creb1   | 0,879 |               |       |       |
| Psm4      | 0,9   | Adcy1   | 0,876 |               |       |       |
| Psm8      | 0,9   | Lyn     | 0,876 |               |       |       |

|        |       |            |       |
|--------|-------|------------|-------|
| Psm7   | 0,9   | Adcy2      | 0,876 |
| Psmf1  | 0,9   | Ptk2       | 0,874 |
| Pma4   | 0,9   | Adcy5      | 0,873 |
| Psmc4  | 0,9   | Adcy7      | 0,873 |
| Pmb2   | 0,9   | Adcy6      | 0,873 |
| Pma7   | 0,9   | Adcy3      | 0,873 |
| Psm14  | 0,9   | Adcy4      | 0,873 |
| Pmb7   | 0,9   | mCG_125315 | 0,873 |
| Psm1   | 0,9   | Mras       | 0,872 |
| Psm13  | 0,9   | Plcb1      | 0,869 |
| Pmb5   | 0,9   | Sphk1      | 0,868 |
| Psm6   | 0,9   | Sphk2      | 0,868 |
| Psmc1  | 0,9   | Gngt1      | 0,866 |
| Psm12  | 0,9   | Gng11      | 0,866 |
| Psmc5  | 0,9   | Plcb3      | 0,865 |
| Pme3   | 0,9   | Ppp2ca     | 0,857 |
| Psm11  | 0,9   | Cacna1a    | 0,854 |
| Psm3   | 0,9   | Ppp2cb     | 0,853 |
| Pmb1   | 0,9   | Creb5      | 0,853 |
| Psm2   | 0,9   | Itgb1      | 0,849 |
| Pmb4   | 0,9   | Itgb7      | 0,846 |
| Icos   | 0,882 | Plce1      | 0,845 |
| Cd83   | 0,875 | Plcb4      | 0,845 |
| Cd80   | 0,874 | Gng2       | 0,843 |
| Il6    | 0,874 | Eef2k      | 0,84  |
| Cd79a  | 0,867 | Plcb2      | 0,84  |
| Itgax  | 0,863 | Plcd3      | 0,84  |
| Icam1  | 0,856 | Plcd4      | 0,84  |
| Traf1  | 0,844 | Plcd1      | 0,84  |
| Akt1   | 0,842 | Itgb5      | 0,838 |
| Itgam  | 0,837 | Itgb6      | 0,838 |
| Il15   | 0,832 | Itgb3      | 0,838 |
| Cd69   | 0,821 | Itpr1      | 0,837 |
| Il2ra  | 0,821 | Itgb8      | 0,835 |
| Il12b  | 0,817 | Gng3       | 0,835 |
| Ctla4  | 0,816 | Plcz1      | 0,834 |
| Foxp3  | 0,807 | Pla2g4a    | 0,832 |
| FasI   | 0,805 | Gng4       | 0,832 |
| Fas    | 0,805 | Gng8       | 0,831 |
| Ddx41  | 0,802 | Gngt2      | 0,831 |
| Il10   | 0,797 | Gm3150     | 0,829 |
| Csf2   | 0,797 | Gm5741     | 0,829 |
| Cd19   | 0,797 | Gng13      | 0,829 |
| Tnfsf4 | 0,796 | Gng7       | 0,829 |
| Cd276  | 0,782 | Gng12      | 0,829 |
| Ifng   | 0,78  | Gng10      | 0,829 |
| Traf6  | 0,779 | Pla2g6     | 0,829 |
| Nfkb1  | 0,778 | Prkd1      | 0,827 |
| Ccl5   | 0,773 | Ppp2r1b    | 0,826 |
| Nfatc3 | 0,772 | Ppp2r1a    | 0,826 |

|          |       |         |       |
|----------|-------|---------|-------|
| Icosl    | 0,764 | Ttf2    | 0,825 |
| Cd1d1    | 0,763 | Pla2g4b | 0,823 |
| Jun      | 0,759 | Pla2g4e | 0,823 |
| Rela     | 0,74  | Pla2g4f | 0,823 |
| Rel      | 0,734 | Ncf1    | 0,823 |
| F3       | 0,735 | Tjp1    | 0,82  |
| Cd27     | 0,733 | Slc9a1  | 0,82  |
| Bcl2l1   | 0,72  | Pla2g4c | 0,82  |
| Bcl6     | 0,712 | Ezr     | 0,819 |
| Cd28     | 0,709 | Prkd3   | 0,819 |
| Il5      | 0,705 | Pla2g4d | 0,818 |
| Jak3     | 0,704 | Itpr2   | 0,815 |
| Cd209a   | 0,703 | Prkd2   | 0,813 |
| Sele     | 0,702 | F11r    | 0,813 |
| Ccr7     | 0,702 | Itpr3   | 0,813 |
| Irf4     | 0,7   | Trpv4   | 0,807 |
| Tnfrsf4  | 0,7   | Gnb5    | 0,806 |
| Mboat4   | 0,699 | Slc6a3  | 0,805 |
| Birc3    | 0,698 | Ttf1    | 0,804 |
| Nfatc2   | 0,698 | Atf6b   | 0,803 |
| Ido1     | 0,697 | Creb3l3 | 0,802 |
| Cxcl12   | 0,695 | Prkca   | 0,802 |
| Nfatc1   | 0,683 | Creb3l4 | 0,802 |
| Nfkbia   | 0,679 | Pax8    | 0,802 |
| Ptprc    | 0,678 | Creb3   | 0,801 |
| Mapk8    | 0,678 | Creb3l2 | 0,801 |
| Stat6    | 0,675 | Creb3l1 | 0,801 |
| Mapk14   | 0,674 | Gnb2l1  | 0,801 |
| Itgb2    | 0,671 | Atf4    | 0,8   |
| Sell     | 0,668 | Egln2   | 0,8   |
| Cd5      | 0,665 | Egln3   | 0,8   |
| Il13     | 0,665 | Egln1   | 0,8   |
| Cd70     | 0,665 | Cd38    | 0,8   |
| Tlr4     | 0,664 | Jam2    | 0,8   |
| Prf1     | 0,663 | Igsf5   | 0,8   |
| Tlr9     | 0,663 | Jam3    | 0,8   |
| Tnfrsf1a | 0,662 | Atp6ap1 | 0,8   |
| H2-K1    | 0,662 | Cdc42   | 0,797 |
| Il7      | 0,661 | Rac1    | 0,782 |
| Stat5a   | 0,66  | Rac2    | 0,774 |
| Alb      | 0,658 | Rac3    | 0,773 |
| Fos      | 0,65  | Pld2    | 0,745 |
| Crp      | 0,643 | Pld1    | 0,733 |
| Ccl2     | 0,643 | Pdpk1   | 0,717 |
| Bcr      | 0,642 | Ywhaq   | 0,698 |
| Tgfb1    | 0,642 | Rictor  | 0,674 |
| Cd38     | 0,635 | Mapk3   | 0,639 |
| C3       | 0,633 | Mapk1   | 0,629 |
| Il18     | 0,627 | Calm1   | 0,627 |
| Cd44     | 0,626 | Calm3   | 0,625 |

|            |       |          |       |
|------------|-------|----------|-------|
| Ccr5       | 0,624 | Smg1     | 0,623 |
| H2-D1      | 0,623 | Gja1     | 0,622 |
| Lepr       | 0,623 | Phlpp2   | 0,617 |
| Vcam1      | 0,62  | Phlpp1   | 0,617 |
| Tnfrsf10b  | 0,62  | Src      | 0,609 |
| Cxcl15     | 0,619 | Prkdc    | 0,606 |
| Ncam1      | 0,617 | Hsp90aa1 | 0,603 |
| Stat1      | 0,614 | Rhoh     | 0,602 |
| Selp       | 0,613 | Rhog     | 0,6   |
| Fcgr2b     | 0,611 | Rhoj     | 0,599 |
| Cd34       | 0,611 | Rhov     | 0,599 |
| Tnfrsf9    | 0,61  | Rhou     | 0,599 |
| Klrb1c     | 0,609 | Rhod     | 0,599 |
| Bcl2       | 0,609 | Rhof     | 0,599 |
| Tnfsf9     | 0,608 | Rhoq     | 0,599 |
| Il17a      | 0,607 | Rhobtb2  | 0,599 |
| Tlr7       | 0,607 | Rhobtb3  | 0,599 |
| Cxcr5      | 0,607 | Rhobtb1  | 0,599 |
| Anxa5      | 0,606 | Rnd3     | 0,599 |
| Thy1       | 0,606 | Rnd1     | 0,599 |
| H2-Ab1     | 0,606 | Rnd2     | 0,599 |
| Ly75       | 0,606 | Mapkap1  | 0,598 |
| Tnfsf8     | 0,605 | Pi4ka    | 0,598 |
| Xiap       | 0,605 | Marcks   | 0,597 |
| Hand2      | 0,604 | Ripk4    | 0,596 |
| Tlr2       | 0,603 | Hsp90ab1 | 0,595 |
| Cd14       | 0,603 | Lrrk2    | 0,591 |
| Il23a      | 0,603 | Lrrk1    | 0,59  |
| Tnfrsf8    | 0,602 | Ptpa     | 0,586 |
| Stat3      | 0,601 | Actb     | 0,584 |
| Relb       | 0,601 | Fras1    | 0,583 |
| Il3ra      | 0,601 | Tbxa2r   | 0,578 |
| Serpinb1a  | 0,601 | Ptk2b    | 0,578 |
| Flt3       | 0,598 | Actg1    | 0,576 |
| Jak2       | 0,596 | Actc1    | 0,574 |
| Nfkb2      | 0,595 | Actg2    | 0,574 |
| Mapk9      | 0,593 | Actbl2   | 0,574 |
| Mapk3      | 0,592 | Acta2    | 0,574 |
| Lck        | 0,59  | Acta1    | 0,574 |
| Map3k1     | 0,581 | Pik3c3   | 0,574 |
| Map2k4     | 0,573 | Ldb3     | 0,568 |
| Cblb       | 0,571 | Map2k1   | 0,558 |
| ENSMUSG001 | 0,57  | Sele     | 0,557 |
| Jak1       | 0,566 | Icam1    | 0,557 |
| Mapk10     | 0,561 | Shank3   | 0,554 |
| Prdm10     | 0,558 | Gja3     | 0,553 |
| Fcgr3      | 0,554 | Cabin1   | 0,549 |
| Serpinb6c  | 0,55  | Ttbk2    | 0,548 |
| Serpinb6b  | 0,55  | Map2k2   | 0,548 |
| Serpinb6e  | 0,55  | Ppp3ca   | 0,548 |

|           |       |         |       |
|-----------|-------|---------|-------|
| Serpinb7  | 0,55  | Rptor   | 0,548 |
| Serpinb9g | 0,55  | Ywhab   | 0,547 |
| Serpinb9f | 0,55  | Mapk14  | 0,547 |
| Serpinb9e | 0,55  | Grin1   | 0,545 |
| Cxcl10    | 0,55  | Wdr31   | 0,544 |
| Serpinb3c | 0,55  | Rxrg    | 0,543 |
| Serpinb9c | 0,55  | Vcam1   | 0,539 |
| Serpinb1c | 0,55  | Calb1   | 0,538 |
| Cd274     | 0,55  | Bcar1   | 0,538 |
| Serpinb9b | 0,55  | Mapk13  | 0,537 |
| Serpinb9  | 0,55  | Gnaq    | 0,537 |
| Serpinb8  | 0,55  | Mapk12  | 0,537 |
| Btk       | 0,549 | Mapk11  | 0,536 |
| Itga2b    | 0,549 | Crk     | 0,535 |
| Dct       | 0,549 | Pik3cd  | 0,535 |
| Serpinb6a | 0,549 | Clock   | 0,535 |
| Serpinb1b | 0,549 | Mapk7   | 0,534 |
| Serpinb2  | 0,549 | Pik3cg  | 0,534 |
| Gapdh     | 0,548 | Pik3cb  | 0,534 |
| Serpinb9d | 0,548 | Pik3ca  | 0,534 |
| Lyn       | 0,547 | Rps6    | 0,532 |
| Alpi      | 0,547 | Map3k1  | 0,527 |
| Myd88     | 0,546 | Ppp3cc  | 0,527 |
| Zap70     | 0,546 | Tep1    | 0,527 |
| Aicda     | 0,545 | Grin2b  | 0,527 |
| Serpinb5  | 0,545 | Map3k5  | 0,526 |
| Cxcr3     | 0,543 | Map3k6  | 0,526 |
| Map4k4    | 0,543 | Ppp3cb  | 0,526 |
| Itgb1     | 0,543 | Prkcz   | 0,525 |
| Gm2023    | 0,541 | Map3k15 | 0,525 |
| Spna2     | 0,54  | Rem1    | 0,522 |
| Il12a     | 0,54  | Mapk4   | 0,52  |
| H2-Q2     | 0,54  | Prkci   | 0,516 |
| Itgb3     | 0,537 | Nfkb1   | 0,516 |
| Tdp2      | 0,536 | Akap5   | 0,515 |
| Src       | 0,536 | Nos1    | 0,513 |
| Ccl19     | 0,536 | Yes1    | 0,505 |
| Tlr3      | 0,536 | Mapk6   | 0,502 |
| Nos1      | 0,535 | Spna2   | 0,502 |
| Cxcr4     | 0,531 | Mapk15  | 0,501 |
| Nfatc4    | 0,529 | Cacng8  | 0,498 |
| Mapk1     | 0,529 | Cacng7  | 0,493 |
| Syk       | 0,528 | Prkaca  | 0,492 |
| Cbl       | 0,527 | Mlst8   | 0,492 |
| Ccl11     | 0,525 | Caln1   | 0,492 |
| Mmp11     | 0,524 | Prkacb  | 0,489 |
| Itga4     | 0,516 | Sdc4    | 0,488 |
| Rag1      | 0,515 | Ywhae   | 0,487 |
| Ms4a1     | 0,512 | Rara    | 0,484 |
| Cr2       | 0,512 | Rarb    | 0,484 |

|           |       |            |       |
|-----------|-------|------------|-------|
| Icam5     | 0,511 | Ywhah      | 0,484 |
| Ccl3      | 0,51  | Chuk       | 0,483 |
| Birc5     | 0,508 | Nfkbia     | 0,482 |
| F2        | 0,508 | Cabp1      | 0,482 |
| Stat5b    | 0,504 | Map2k5     | 0,481 |
| Nr3c1     | 0,505 | Ikbkb      | 0,481 |
| Tnfrsf13b | 0,504 | Araf       | 0,481 |
| Cdkn1a    | 0,504 | Ywhag      | 0,476 |
| Ccr2      | 0,502 | Prkx       | 0,475 |
| Il7r      | 0,501 | Net1       | 0,474 |
| Cd22      | 0,499 | Arhgef3    | 0,474 |
| Tyk2      | 0,497 | Casp3      | 0,474 |
| Rag2      | 0,496 | Calb2      | 0,474 |
| Sdc1      | 0,496 | Mapk8      | 0,474 |
| Trp53     | 0,495 | Gm16505    | 0,472 |
| Tnfrsf18  | 0,489 | ENSMUSG001 | 0,472 |
| Ighg2c    | 0,488 | Zfand4     | 0,471 |
| Emr1      | 0,485 | ENSMUSG001 | 0,471 |
| Myh1      | 0,484 | Ppp1r14a   | 0,471 |
| Tbx21     | 0,483 | Pik3c2g    | 0,47  |
| Map3k5    | 0,478 | Pik3c2a    | 0,469 |
| Spn       | 0,476 | Plrg1      | 0,469 |
| Gzmb      | 0,475 | Mapk10     | 0,468 |
| Csf3      | 0,473 | Ret        | 0,467 |
| Fyn       | 0,47  | Tnnc1      | 0,466 |
| Il1b      | 0,47  | Cabp2      | 0,466 |
| Nfkbib    | 0,469 | Gm11639    | 0,466 |
| Il4ra     | 0,468 | Efcab6     | 0,466 |
| Cd68      | 0,468 | Tnnc2      | 0,466 |
| Cd4       | 0,467 | Efcab7     | 0,466 |
| Itgb7     | 0,466 | Calml3     | 0,466 |
| Cxcl9     | 0,465 | Efcab9     | 0,466 |
| Fcgr4     | 0,462 | Spata21    | 0,466 |
| Flt3l     | 0,461 | Calm2      | 0,466 |
| Pdcd1lg2  | 0,454 | Efcab11    | 0,466 |
| Cast      | 0,453 | Calm4      | 0,466 |
| Map2k6    | 0,453 | Calml4     | 0,466 |
| Cyth1     | 0,452 | Ocm        | 0,466 |
| Mapk11    | 0,45  | Efcab2     | 0,466 |
| Apoe      | 0,45  | Cabp4      | 0,466 |
| Prdm1     | 0,448 | Scgn       | 0,466 |
| Atp7a     | 0,448 | ENSMUSG001 | 0,466 |
| Cxcl13    | 0,447 | Efcab3     | 0,466 |
| Il9       | 0,447 | Cabp7      | 0,466 |
| Cd207     | 0,445 | Pvalb      | 0,466 |
| Map2k3    | 0,443 | Cabp5      | 0,466 |
| Itga2     | 0,443 | Cish       | 0,465 |
| Ccl4      | 0,443 | Trp53      | 0,464 |
| Wdfy2     | 0,442 | Egf        | 0,463 |
| mt-Nd1    | 0,442 | Ttrap      | 0,461 |

|           |       |         |       |
|-----------|-------|---------|-------|
| Il21      | 0,442 | Pfkfb3  | 0,461 |
| Csf1      | 0,442 | Pfkfb2  | 0,461 |
| Dnase1    | 0,442 | Atr     | 0,46  |
| Npr2      | 0,44  | Sfn     | 0,46  |
| Faim3     | 0,44  | Ywhaz   | 0,457 |
| Vwf       | 0,438 | Rxra    | 0,457 |
| Slc11a1   | 0,438 | Gdnf    | 0,454 |
| Cd48      | 0,437 | Ehmt1   | 0,454 |
| Irak1     | 0,436 | Ehmt2   | 0,454 |
| Itih4     | 0,436 | Icam5   | 0,452 |
| Pmel      | 0,434 | Syngap1 | 0,45  |
| Bcl3      | 0,433 | Tert    | 0,448 |
| Lamp3     | 0,432 | Mapk9   | 0,447 |
| Stat2     | 0,432 | Snca    | 0,447 |
| Tlr1      | 0,432 | Nos3    | 0,445 |
| Rassf5    | 0,432 | Decr1   | 0,443 |
| Casp3     | 0,43  | Actl11  | 0,442 |
| Ptgs2     | 0,43  | Rarg    | 0,442 |
| Tmprss11d | 0,43  | Atf7    | 0,441 |
| Traf5     | 0,429 | Rhbdl3  | 0,441 |
| Kit       | 0,429 | Actl9   | 0,44  |
| Mmp9      | 0,429 | Gm498   | 0,44  |
| Casp8     | 0,428 | Actl10  | 0,44  |
| Apoh      | 0,427 | Actl7b  | 0,44  |
| Ccr1      | 0,425 | Actl7a  | 0,44  |
| Il2rb     | 0,424 | Actrt1  | 0,44  |
| Mme       | 0,424 | Actrt2  | 0,44  |
| Eif6      | 0,422 | Arpm1   | 0,44  |
| Ccr3      | 0,422 | Actr1b  | 0,44  |
| Pdcd1     | 0,422 | Actr1a  | 0,44  |
| Itgal     | 0,42  | Actr10  | 0,44  |
| Slamf1    | 0,42  | Nfkb2   | 0,44  |
| Itgae     | 0,42  | Stat5a  | 0,439 |
| Stat4     | 0,42  | Stat5b  | 0,439 |
| C4b       | 0,409 | Jak2    | 0,439 |
| Kitl      | 0,409 | Jak1    | 0,437 |
| Cntnap1   | 0,408 | Tyk2    | 0,437 |
| Tlr8      | 0,407 | Jak3    | 0,437 |
| Akt3      | 0,407 | Pfkfb1  | 0,437 |
| Mbp       | 0,407 | Pfkfb4  | 0,437 |
| Selp1g    | 0,405 | Mylpf   | 0,437 |
| Il10ra    | 0,404 | Gnat2   | 0,437 |
| Cd36      | 0,404 | Gnat3   | 0,437 |
| Vamp8     | 0,404 | Gnat1   | 0,437 |
| Tslp      | 0,404 | Nos2    | 0,437 |
| Akt2      | 0,403 | Lck     | 0,437 |
| Cd8a      | 0,402 | Hck     | 0,437 |
| Il21r     | 0,402 | Gfpt1   | 0,436 |
| Fcgr1     | 0,401 | Gfpt2   | 0,436 |
| Gata3     | 0,4   | Cnot6l  | 0,434 |

|            |       |
|------------|-------|
| Cnot6      | 0,434 |
| Prkg2      | 0,433 |
| Cd8b1      | 0,433 |
| Prkg1      | 0,432 |
| Inpp1      | 0,43  |
| Cdk2       | 0,428 |
| Gna13      | 0,425 |
| Gna12      | 0,425 |
| Igf1       | 0,424 |
| Map3k14    | 0,424 |
| Ysk4       | 0,423 |
| Map3k2     | 0,423 |
| Map3k3     | 0,423 |
| Gnaz       | 0,422 |
| Pdk2       | 0,421 |
| Bad        | 0,42  |
| Inpp5d     | 0,419 |
| Mef2c      | 0,419 |
| Mef2a      | 0,419 |
| Mef2d      | 0,419 |
| Pdyn       | 0,419 |
| Itsn1      | 0,419 |
| Itsn2      | 0,419 |
| Keap1      | 0,418 |
| Prkar2b    | 0,418 |
| Lrdd       | 0,418 |
| Nrg3       | 0,418 |
| Pik3c2b    | 0,417 |
| Adam17     | 0,416 |
| Cdk1       | 0,416 |
| Adam33     | 0,416 |
| Adam12     | 0,416 |
| Adam19     | 0,416 |
| Diras2     | 0,416 |
| Rps6kb1    | 0,416 |
| Gna11      | 0,415 |
| Gna14      | 0,415 |
| Rps6kb2    | 0,414 |
| Gna15      | 0,413 |
| Ppp2r5c    | 0,413 |
| Ppp2r5d    | 0,413 |
| Pdk3       | 0,412 |
| Pdk4       | 0,412 |
| Pdk1       | 0,412 |
| Rasl10b    | 0,41  |
| Mef2b      | 0,408 |
| ENSMUSG001 | 0,408 |
| Nrg2       | 0,408 |
| Il2        | 0,408 |
| Diras1     | 0,408 |



|           |       |
|-----------|-------|
| Blk       | 0,408 |
| Pard6a    | 0,408 |
| Rasl10a   | 0,408 |
| Fyn       | 0,407 |
| Nedd9     | 0,406 |
| Elk1      | 0,406 |
| Sdc2      | 0,404 |
| Arhgef10l | 0,403 |
| Umps      | 0,403 |
| Stt3a     | 0,402 |
| Stt3b     | 0,402 |

- Map3k1      Activates the ERK and JNK kinase pathways by phosphorylation of MAP2K1 and MAP2K4.  
May phosphorylate the MAPK8/JNK1 kinase.
- Lyn          Phosphorylates SYK. Regulates activation of the MAP kinase signaling cascade,  
including activation of MAPK1/ERK2, MAPK3/ERK1, MAPK8/JNK1 and MAPK9/JNK2.
- Map3k5      Activates c-Jun N-terminal kinase (JNK)/stress-activated protein kinase (SAPK).
