# Supplementary material for: Signalling Pathways Mediating the Effects of CD40-Activated CD40L Reverse Signalling on Inhibitory Medium Spiny Neuron Neurite Growth
Source: MDPI journal article supplement (doi:10.3390/cells10040829), 2021-04-07
Supplement: s1 [file s1]

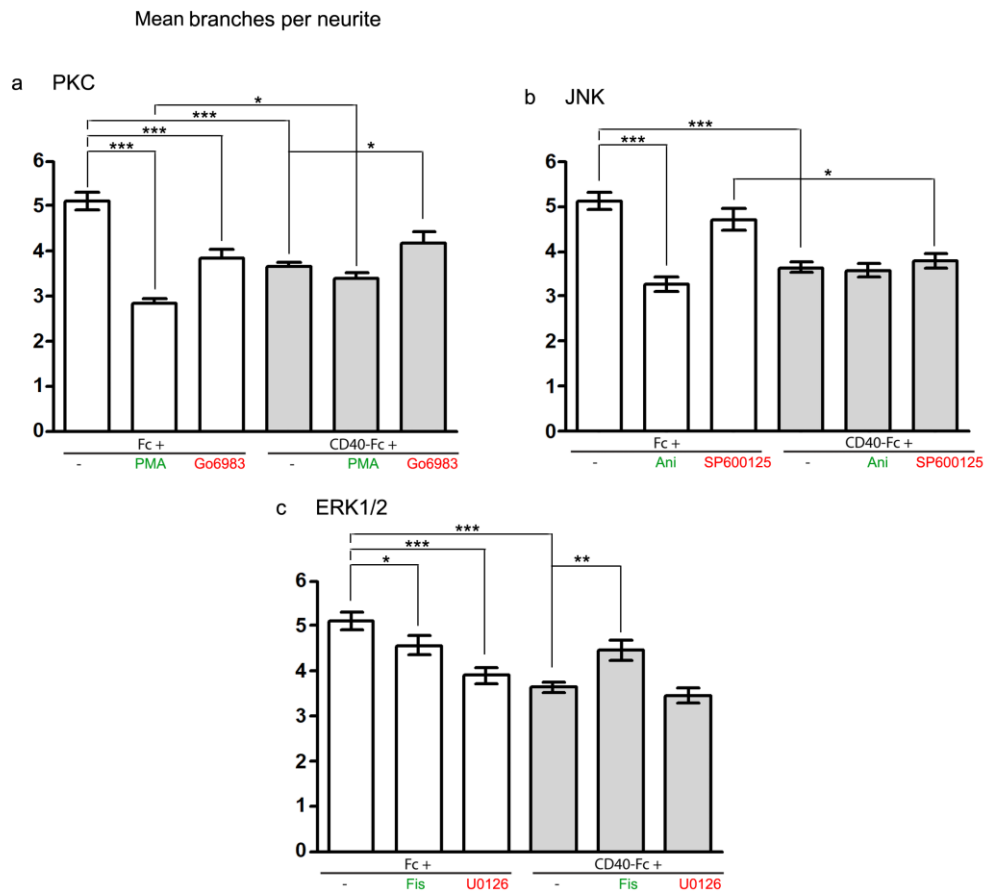

**Figure S1. Effect of pharmacological reagents on the mean of branches per neurite from MSNs.** (a, b and c) Quantification of the influence of pharmacological reagents on the number of branches per neurite. Cultures of striatal MSNs were established from E14 *Cd40*<sup>-/-</sup> embryos. The cultures were treated 24h after plating with either 1  $\mu$ g/ml of Fc (white bars) or 1  $\mu$ g/ml of CD40-Fc (grey bars) together with pharmacological manipulators of PKC (either 500 nM PMA or 500 nM Go6983) (a), JNK (either 50 nM Ani or 1  $\mu$ M SP600125) (b), and ERK1/ERK2 (either 1  $\mu$ M Fis or 1  $\mu$ M U0126) (c). The activators are labelled in green and the inhibitors in red. Mean  $\pm$  s.e.m of at least three independent experiments. The number of neurons counted per condition are given below. One-way ANOVA with multiple Newman-Keuls statistical comparison. Key statistical significance differences are indicated (\*\*\*)  $p < 0.001$ , \*\*  $p < 0.01$  and \*  $p < 0.05$ ).

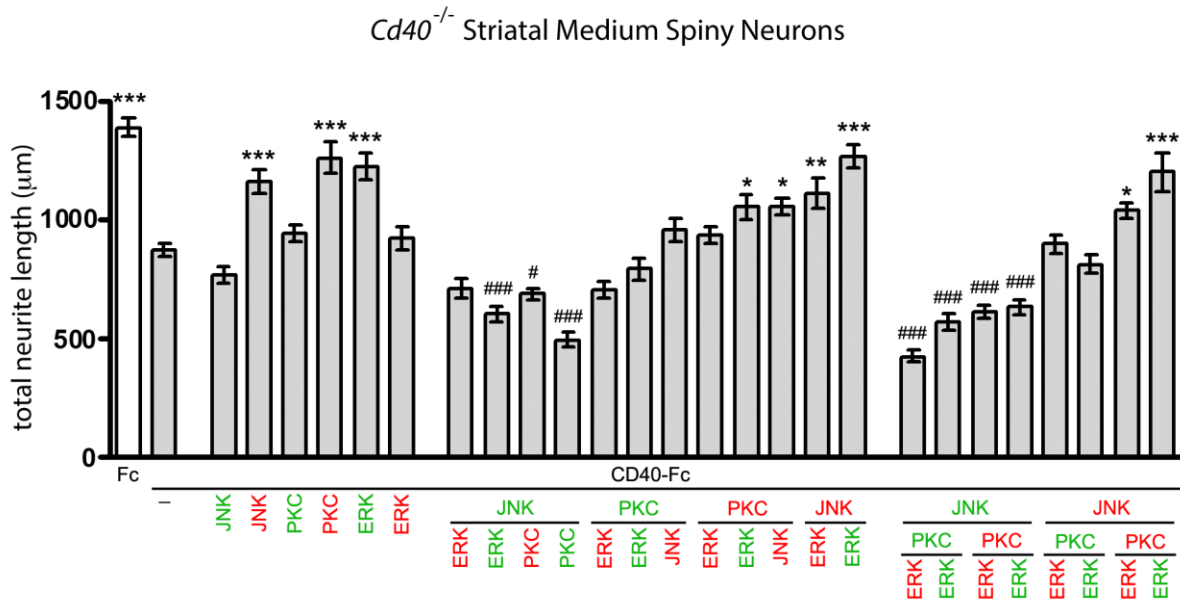

**Figure S2. Total neurite length with all pharmacological reagents in combination.** Quantification of total neurite lengths of neurons cultured for 10 days *in vitro*, and treated 24 h after plating with the indicating combination of reagents in presence of 1 μg/ml CD40-Fc (grey bars). Control Fc at 1 μg/ml is shown as reference (white bar). The graph shows the mean ± s.e.m of at least three independent experiments. T-test comparisons versus neurons treated with CD40-Fc, \*\*\*  $p < 0.001$ , \*\*  $p < 0.01$  and \*  $p < 0.05$  (# indicates significant differences but in the opposite direction).

## *Cd40*<sup>-/-</sup> Striatal Medium Spiny Neurons

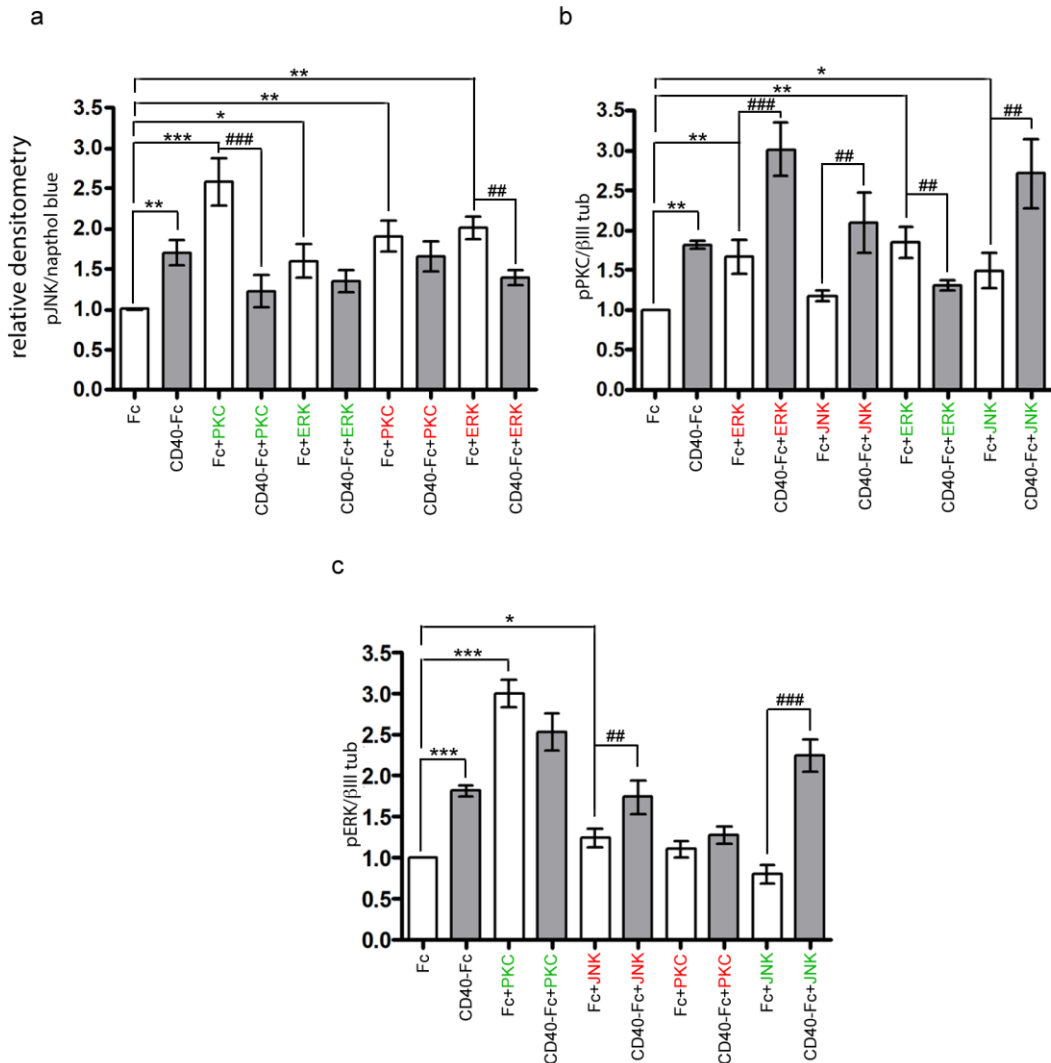

**Figure S3. Basal effects on JNK, PKC and ERK1/ERK2 phosphorylation by pharmacological reagents.** (a, b, c) Quantification of the basal effect of pharmacological reagents (compared with Fc, significances indicated with \*) and in absence and presence of CD40-Fc (significances indicated with #). (a) Effect on the phospho-JNK, (b) phospho-PKC and (c) phospho-ERK1/phospho-ERK2. The concentrations were the same as those indicated in Figure 2. Quantification of at least three independent Western blots. The mean  $\pm$  s.e.m are indicated (\*\*\*)  $p < 0.001$ , \*\*  $p < 0.01$  and \*  $p < 0.05$ , one-way ANOVA with multiple Newman-Keuls statistical comparison).

**Scheme 1. Protein-protein interactions (PPI) for mouse CD40L and PKC $\gamma$  and in common between CD40L and PKC $\gamma$ .** The table lists all PPIs with reliable scores of 0.4 and greater for CD40L, PKC $\gamma$ , and in common. The proteins highlighted indicate the most relevant proteins in common that might be involved in CD40-activated CD40L reverse signalling. These proteins include members of JNK and ERK and associated regulatory proteins like: Map3k1 that activates the ERK1/2 and JNK kinase pathways; Map3k5 that activates JNK but does not have any effect on the activation of MAPK/ERK1/2; and Lyn a protein that phosphorylates Syk and regulates the activation of the ERK1/ERK2 and JNK1/JNK2.

### Number of neurons counted per condition

**Figure 2. and Supplemental Figure S1:** Fc n=87; CD40-Fc n=93; Fc + PKC n=77; CD40-Fc + PKC n=73; Fc + JNK n=53; CD40-Fc + JNK n=53; Fc + ERK n=51; CD40-Fc + ERK n=59; Fc + PKC + JNK n=44; CD40-Fc + PKC + JNK n=54; Fc + PKC + ERK n=45; CD40-Fc + PKC + ERK n=56.

**Figure 3. and Supplemental Figure S2:** Fc n=87; CD40-Fc n=93; CD40-Fc + PKC n=73; CD40-Fc + PKC n=48; CD40-Fc + JNK n=53; CD40-Fc + JNK n=54; CD40-Fc + ERK n=59; CD40-Fc + ERK n=56; CD40-Fc + PKC + JNK n=37; CD40-Fc + PKC + ERK n=43; CD40-Fc + PKC + JNK n=37; CD40-Fc + PKC + ERK n=47; CD40-Fc + JNK + ERK n=43; CD40-Fc + JNK + ERK n=38; CD40-Fc + PKC + ERK n=43; CD40-Fc + PKC + JNK n=37; CD40-Fc + PKC + ERK n=40; CD40-Fc + PKC + JNK n=49; CD40-Fc + JNK + ERK n=54; CD40-Fc + JNK + ERK n=36; CD40-Fc + JNK + ERK n=54; CD40-Fc + PKC + JNK + ERK n=33; CD40-Fc + PKC + JNK + ERK n=34; CD40-Fc + PKC + JNK + ERK n=38; CD40-Fc + PKC + JNK + ERK n=39; CD40-Fc + PKC + JNK + ERK n=35; CD40-Fc + PKC + JNK + ERK n=38; CD40-Fc + PKC + JNK + ERK n=42; CD40-Fc + PKC + JNK + ERK n=78.

### Rest of statistical comparisons

**Figure 2.** PKC: \*\*\* $p < 0.001$  (Fc vs CD40-Fc + PKC) (PKC vs PKC) (PKC vs CD40-Fc + PKC) (PKC vs CD40-Fc) (PKC vs CD40-Fc + PKC) (CD40-Fc + PKC vs CD40-Fc + PKC). JNK: \*\*\* $p < 0.001$  (Fc vs CD40-Fc + JNK) (Fc vs CD40-Fc + JNK) (JNK vs JNK) (JNK vs CD40-Fc + JNK) (JNK vs CD40-Fc) (JNK vs CD40-Fc + JNK) (CD40-Fc + JNK vs CD40-Fc + JNK); \*\* $p < 0.01$  (JNK vs CD40-Fc); \* $p < 0.01$  (CD40-Fc + JNK vs CD40-Fc). ERK: \*\*\* $p < 0.001$  (ERK vs CD40-Fc) (CD40-Fc + ERK vs Fc) (CD40-Fc + ERK vs ERK) (CD40-Fc + ERK vs CD40-Fc + ERK); \*\* $p < 0.01$  (Fc vs CD40-Fc + ERK) (CD40-Fc vs ERK) .
